# Supplementary material for: Development of a Machine Learning Classifier for Brain Tumors Diagnosis Based on DNA Methylation Profile
Source: Front Bioinform. 2021 Nov 8;1:744345. doi: 10.3389/fbinf.2021.744345 (PMC9581020; doi:10.3389/fbinf.2021.744345)
Supplement: Supplementary file 1 [file Table2.XLSX]

## Sheet: Sheet1
Supplementary Table S2. Misclassified result of the validation set. “Ground truth” is the true label, “predicted result” is the class label misclassified by the MLP model, and “count” shows the number of misclassified samples in the corresponding category.
Ground Truth	Predicted result	Count
A IDH	A IDH, HG	1
A IDH	O IDH	2
A IDH, HG	ANA PA	1
A IDH, HG	O IDH	1
A IDH, HG	A IDH	3
ANA PA	GBM, MID	1
ANA PA	A IDH, HG	1
ANA PA	GBM, RTK II	1
ANA PA	DMG, K27	1
ANA PA	LGG, PA/GG ST	2
ANA PA	CONTR, REACT	1
ATRT, SHH	ATRT, TYR	1
DMG, K27	A IDH, HG	2
DMG, K27	ANA PA	2
DMG, K27	GBM, MID	1
EPN, PF A	GBM, MYCN	2
EPN, PF B	GBM, RTK II	1
EPN, PF B	EPN, PF A	1
EPN, RELA	PLEX, PED B	1
EPN, RELA	GBM, MES	1
EPN, SPINE	LGG, SEGA	1
GBM, MES	GBM, RTK II	18
GBM, MID	CONTR, CEBM	1
GBM, MID	A IDH, HG	2
GBM, MID	DMG, K27	1
GBM, MID	ANA PA	1
GBM, MYCN	GBM, RTK II	3
GBM, MYCN	GBM, RTK III	1
GBM, MYCN	EFT, CIC	1
GBM, MYCN	ATRT, SHH	2
GBM, MYCN	DMG, K27	2
GBM, RTK I	GBM, MES	3
GBM, RTK I	GBM, RTK II	10
GBM, RTK II	GBM, RTK I	5
GBM, RTK II	GBM, MES	8
GBM, RTK III	GBM, RTK II	3
GBM, RTK III	GBM, MYCN	2
HGNET, MN1	ETMR	1
HGNET, MN1	EFT, CIC	1
HGNET, MN1	HGNET, BCOR	1
IHG	CNS NB, FOXR2	1
IHG	GBM, RTK II	1
LGG, DNT	LGG, PA PF	1
LGG, DNT	LGG, PA/GG ST	1
LGG, GG	HMB	1
LGG, MYB	SUBEPN, PF	1
LGG, PA MID	CONTR, REACT	1
LGG, PA MID	LGG, PA PF	1
LGG, PA PF	LGG, MYB	1
LGG, PA PF	LGG, PA/GG ST	6
LGG, PA/GG ST	LGG, DNT	2
LGG, PA/GG ST	DLGNT	1
LGG, PA/GG ST	LGG, SEGA	1
MB, G3	PIN T, PB A	1
MB, G4	MB, SHH CHL AD	1
MB, G4	MB, G3	1
MB, SHH CHL AD	LGG, DNT	1
MB, SHH INF	MB, SHH CHL AD	3
MB, WNT	GBM, RTK III	1
MB, WNT	MB, G3	1
MELAN	GBM, MES	1
MNG	GBM, MES	1
MNG	GBM, MYCN	1
MNG	DMG, K27	1
MNG	EWS	1
MNG	SUBEPN, PF	1
O IDH	A IDH	1
O IDH	A IDH, HG	2
PIN T, PB B	PIN T, PB A	1
PITAD, STH DNS B	PITAD, PRL	1
PITAD, TSH	PITAD, PRL	1
PLEX, PED A	PLEX, PED B	1
PLEX, PED B	PIN T, PPT	1
PXA	MELAN	1
PXA	GBM, MES	2
SCHW, MEL	CHORDM	1
SCHW, MEL	SCHW	1
SCHW, MEL	MELCYT	1
SUBEPN, SPINE	GBM, MYCN	1
